# Supplementary material
Source: MDPI journal article supplement (https://www.mdpi.com/2227-9717/9/6/994)
Supplement: s1 [file s1 › processes-1242785-SI.pdf]

# Accuracy of improving $^{14}\text{C}$ method applied in the biomass and coal co-firing power stations

Yuxing Tang, Zhongyang Luo\* and Chunjiang Yu

State Key Laboratory of Clean Energy Utilization, Zhejiang University, Hangzhou 31 0027, Zhejiang, China

\* Correspondence: Corresponding author: zyluo@zju.edu.cn Tel: +86-571-8795-2440; Email address: zyluo@zju.edu.cn (Zhongyang Luo)

## 1. Figure Captions

Fig. S1 (b) shows the  $^{14}\text{C}$  activity and local FCD of JFJ, SIL, CMH, FHM, GG from 2005 to 2018. In these years, the FCD of Xi'an increased, while other places just changed within a limited range. The FCD value of Zunyi is quite close to that of Switzerland and is slightly lower than that of Germany. Meanwhile, the  $^{14}\text{C}$  activities obtained from the three sampling sites are consistent. All the same, there is a huge gap between the FCD value of Xi'an and Zunyi leading to the lower  $^{14}\text{C}$  activity of CHM tree rings 2 pMC than that of the Northern Hemisphere atmospheric background, even though all these  $^{14}\text{C}$  activity data were sampled from mountains.

According to Fig. S1, GG and SQ may have similar local general atmospheric  $^{14}\text{C}$  activity to Zhunyi owing to the same FCD values.

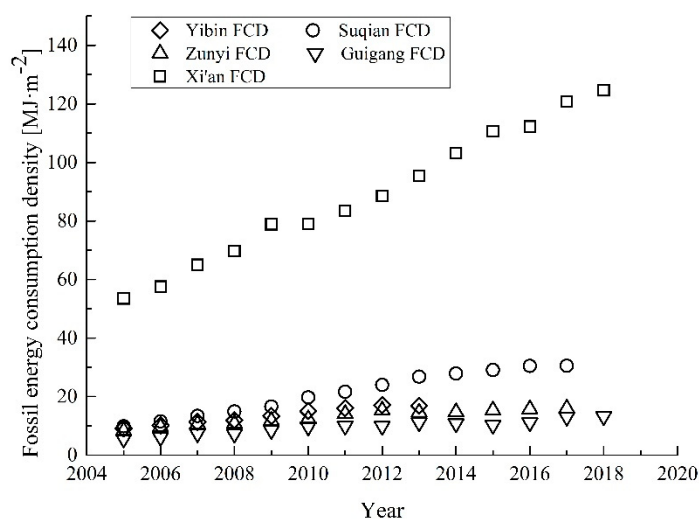

(a)

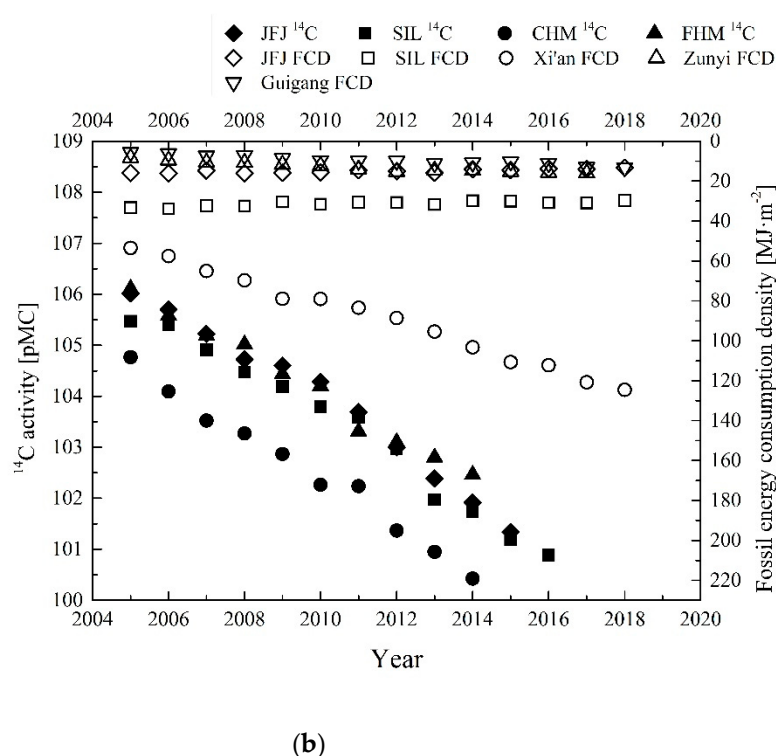

**Figure S1.** (a) Local fossil energy consumption density (FCD) of Guigang (GG), Suqian (SQ) and other places in the period of 2005–2018; (b)  $^{14}\text{C}$  activity of samples from Cuihua mountain (CHM) in Xi'an[16], Fenghuang mountain (FHM) in Zunyi[15], Jungfrauoch (JFJ) in Switzerland and Schauinsland (SIL) in Germany[10], and these places' local Fossil energy consumption density (FCD)[17,19], in the period of 2005–2018.

Referring to the zinc reduction method reported by Xu et al.[18], a set of high vacuum pipelines for graphitization has been built as shown in Fig. S2. Firstly, dried organic powder which contains 2–3 mg C and 35–40 mg CuO powder is sealed in the quartz tube and burned at 0.1 Pa and 900°C for 7 hours. Secondly, the quartz tube is broken in a cracker, and the  $\text{CO}_2$  flows into the pipelines. After the impurities have been removed and  $\text{CO}_2$  metering, the  $\text{CO}_2$  sample gas is captured in the reduction unit. The reduction unit is a set of glass tubes. The outer tube contains a mixed powder of 30–35 mg Zn and 10–15 mg  $\text{TiH}_2$ , which is used to generate  $\text{H}_2$  and reduce  $\text{CO}_2$  to CO. The inner tube contains 3–5 mg Fe powder, which is the catalyst for reducing CO to graphite. Finally, a torch fire is used to seal the sample  $\text{CO}_2$  gas in the reduction unit. The graphitization reaction needs to be at 500°C for 3h then 550°C for 4h. More details can be found in Xu et al.[18].

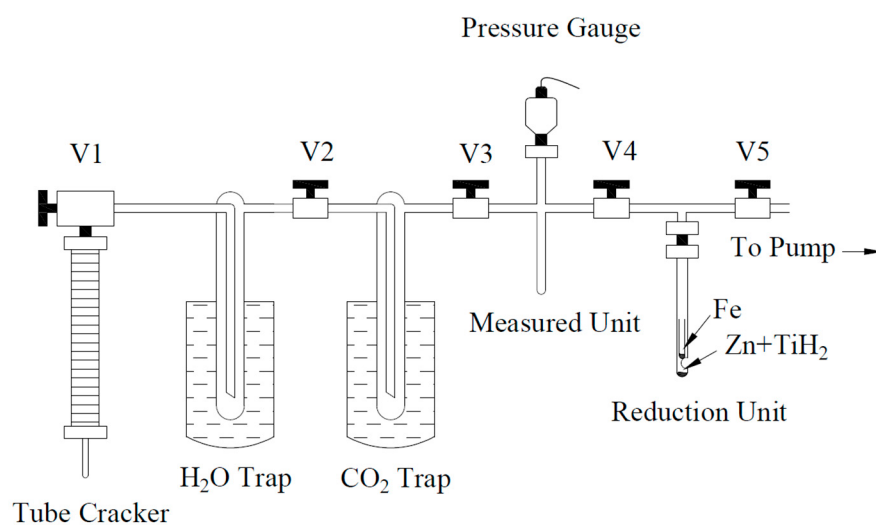

**Figure S2.** Graphitization system. H<sub>2</sub>O trap cooled with ethanol at  $-65^{\circ}\text{C}$ ; CO<sub>2</sub> trap cooled with liquid nitrogen; V1-V5: valves;

## 2. Table Captions

**Table S1.** <sup>14</sup>C activity of sampled annual crops and tree rings.

| Sample                    | Lab. Code | <sup>14</sup> C activity [pMC] | Sample                   | Lab. Code | <sup>14</sup> C activity [pMC] |
|---------------------------|-----------|--------------------------------|--------------------------|-----------|--------------------------------|
| <i>SQ<sub>A</sub>-R</i>   | XA50256   | 96.67±0.21                     | <i>SQ-P<sub>B</sub></i>  | XA50251   | 99.22±0.32                     |
| <i>SQ<sub>B</sub>-R</i>   | XA50257   | 98.46±0.31                     | <i>GG<sub>A</sub>-R</i>  | XA50259   | 98.25±0.19                     |
| <i>SQ<sub>C</sub>-R</i>   | XA50258   | 98.89±0.21                     | <i>GG<sub>A</sub>-C</i>  | XA50261   | 98.95±0.21                     |
| <i>SQ-P<sub>R1</sub></i>  | XA50246   | 101.74±0.19                    | <i>GG<sub>A</sub>-S</i>  | XA50263   | 98.73±0.20                     |
| <i>SQ-P<sub>R4</sub></i>  | XA50247   | 101.67±0.32                    | <i>GG-E<sub>R1</sub></i> | XA50252   | 102.33±0.27                    |
| <i>SQ-P<sub>R7</sub></i>  | XA50248   | 99.28±0.18                     | <i>GG-E<sub>R4</sub></i> | XA50253   | 100.20±0.19                    |
| <i>SQ-P<sub>R10</sub></i> | XA52049   | 98.75±0.19                     | <i>GG-E<sub>R6</sub></i> | XA50254   | 100.31±0.22                    |
| <i>SQ-P<sub>R13</sub></i> | XA50250   | 98.88±0.24                     | <i>GG-E<sub>B</sub></i>  | XA50255   | 99.94±0.22                     |
